# Supplementary material for: Generation of a lethal mouse model expressing human ACE2 and TMPRSS2 for SARS-CoV-2 infection and pathogenesis
Source: Research Square preprint supplement (doi:10.21203/rs.3.rs-3301723/v1), 2023-10-23
Supplement: Supplementary file 1 [file 41f3c03fda3d148aa169e0a1.pdf]

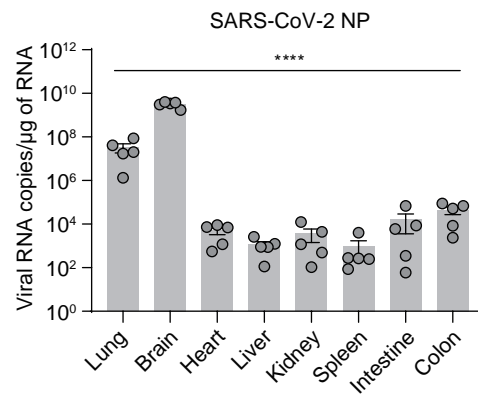

**Supplementary FIG 1** Tissue distribution of SARS-CoV-2 in the double-transgenic mice. Viral loads in the lungs, brain, heart, liver, kidney, spleen, intestine, and colon of the infected mice (6 dpi) were detected by using RT-qPCR. Symbols represent means  $\pm$  SEM. Statistically significant differences between the groups were determined using one-way ANOVA.
